1  
2  
3  
4  
5  
6  
7  
8  
9  
10  
11  
12  
13  
14  
15  
16  
17  
18

## **Phantom auditory perception (tinnitus) is characterised by stronger anticipatory auditory predictions**

Marta Partyka<sup>1</sup>, Gianpaolo Demarchi<sup>1</sup>, Sebastian Roesch<sup>2</sup>, Nina Suess<sup>1</sup>, William Sedley<sup>3</sup>, Winfried Schlee<sup>4</sup> and Nathan Weisz<sup>1</sup>

<sup>1</sup> Salzburg Brain Dynamics Lab, Centre of Cognitive Neuroscience, Division of Physiological Psychology, University of Salzburg, Austria.

<sup>2</sup> Department of Otorhinolaryngology–Head and Neck Surgery, The Paracelsus Private Medical University of Salzburg, Salzburg, Austria.

<sup>3</sup> Institute of Neuroscience, Newcastle University Medical School, Newcastle upon Tyne, United Kingdom.

<sup>4</sup> Department of Psychiatry and Psychotherapy, University of Regensburg, Germany.

Corresponding author: [marta.s.partyka@gmail.com](mailto:marta.s.partyka@gmail.com)

19 **Abstract**

20           How phantom perceptions arise and the factors that make individuals prone to such  
21 experiences are not well understood. An attractive phenomenon to study these questions is tinnitus,  
22 a very common auditory phantom perception which is not explained by hyperactivity in the  
23 auditory pathway alone. Our framework posits that a predisposition to developing (chronic)  
24 tinnitus is dependent on individual traits relating to the formation and utilization of sensory  
25 predictions. Predictions of auditory stimulus frequency (remote from tinnitus frequency) were  
26 studied using a paradigm parametrically modulating regularity (i.e. predictability) of tone  
27 sequences and applying decoding techniques on magnetoencephalographic (MEG) data. For  
28 processes likely linked to short-term memory, individuals with tinnitus showed an enhanced  
29 anticipatory prediction pattern associated with increasing sequence regularity. In contrast,  
30 individuals without tinnitus engaged the same processes following the onset of the to-be-decoded  
31 sound. We posit that this tendency to optimally anticipate static and changing auditory inputs may  
32 determine which individuals faced with persistent auditory pathway hyperactivity factor it into  
33 auditory predictions, and thus perceive it as tinnitus. While our study constitutes a first step relating  
34 vulnerability to tinnitus with predictive processing, longitudinal studies are needed to confirm the  
35 predisposition model of tinnitus development.

36

37

38

39

## 40 Introduction

41 Phantom perceptions do not require sensory input transduced by peripheral receptors. The  
42 common auditory phantom perception known as tinnitus affects approximately ~10%<sup>1,2</sup> of the  
43 population. Individuals experience tinnitus by consciously perceiving relatively simple sounds  
44 such as pure tones or narrow band noises without an identifiable objective environmental or bodily  
45 source. Tinnitus can be accompanied by substantial distress and reduced quality of life, which  
46 appears to be independent of the intensity of the perceived sound<sup>3</sup>. The mechanisms by which this  
47 phantom sound emerges from ongoing brain activity (so-called “neural correlates”) have still not  
48 been resolved. A broad consensus supports the idea that some form of hearing damage (with or  
49 without clear audiometric changes)<sup>4-6</sup> stands at the outset of tinnitus development, leading to  
50 maladaptive functional or structural changes within or beyond the auditory system<sup>7-9</sup>. By far the  
51 most popular view postulates a change of neural gain in deprived regions of the auditory pathway,  
52 thereby amplifying spontaneous activity which is interpreted as sound by downstream cortical  
53 regions (for review see<sup>10</sup>; we will subsequently refer to this general idea as *altered gain model*).

54 Research along these lines has focused mostly on probable “neural correlate” candidates  
55 of tinnitus such as increased spontaneous firing rate or enhanced neural synchrony. The *altered*  
56 *gain model* of tinnitus is substantially supported by studies in animals<sup>11</sup>, despite the obvious  
57 challenges in obtaining subjective reports. In humans the supporting evidence for this model is  
58 less apparent, partly because (contrary to animal models) the research is focused on chronic rather  
59 than acute tinnitus, but also due to a lack of understanding as to how measures commonly obtained  
60 in humans (such as oscillatory power in M/EEG or BOLD in fMRI) can be translated to those used  
61 to support the *altered gain model*. Based on human and animal works in other domains<sup>12</sup>, reduced  
62 ongoing alpha or increased gamma in auditory regions pertinent for phantom sounds (for other  
63 auditory phantom percepts see<sup>13,14</sup>) may be relevant to perception of tinnitus. However, the  
64 empirical evidence is inconclusive<sup>15,16</sup>. With the exception of technical or practical issues that  
65 may complicate a convincing confirmation of the altered gain model in humans, other observations  
66 speak in favour of its explanatory insufficiency<sup>17</sup>: 1) Only a fraction of individuals who suffer a  
67 hearing impairment will experience tinnitus (~70% following sensorineural hearing loss; see<sup>18-</sup>  
68<sup>20</sup>). 2) The onset of tinnitus and the onset of the hearing loss often occur at different times. 3) Not  
69 all cases of acute tinnitus will become chronic. One possibility to overcome these explanatory gaps  
70 is to frame tinnitus perception within a Bayesian inference framework<sup>21</sup>, which emphasizes the  
71 constructive nature of perception being guided by internal models<sup>22</sup>. In order to establish and  
72 improve internal models, incoming sensory input is compared to predictions (so-called *priors*),

73 which need to be cast in real-time in dynamic environments. In a recent predictive coding view,  
74 tinnitus is seen as a consequence of a default prediction of silence altering to one of sound when  
75 faced with (enhanced) spontaneous activity (“tinnitus precursor”) along the auditory pathway<sup>21</sup>.  
76 While conceptually overcoming many inconsistencies related to the altered gain model<sup>17</sup>, strong  
77 support for this view is lacking partially due to the non-trivial task of deriving robust and direct  
78 measures of tinnitus-supporting priors from ongoing brain activity. Recent work has found indirect  
79 evidence of altered priors in established tinnitus<sup>23</sup>, but the question of how and why such altered  
80 priors should even emerge in certain individuals remains open.

81 A recent line of reasoning holds that increased precision of priors could drive hallucinatory  
82 experiences<sup>24,25</sup>. Indeed, interindividual variability in prior strength assessed in a visuo-auditory  
83 conditioning task predicts the experience of hallucinations in daily life<sup>26</sup>. We postulate that the  
84 predisposition to developing tinnitus may be contingent on an individual's - putatively relatively  
85 stable, “trait-like” - tendency to more strongly engage in predictive processing in the auditory  
86 modality. Ideally individualized measures of auditory predictive processing tendencies would be  
87 obtained *before* a potentially tinnitus-inducing event and then compared between individuals that  
88 do or do not develop (chronic) tinnitus. However, this is difficult to pursue in humans for ethical  
89 and practical reasons. In a first step to establish our tinnitus-predisposition framework, we focus  
90 on comparing individuals with chronic tinnitus and healthy controls. Using stimulus frequencies  
91 remote from those of tinnitus should reduce the chance of identifying consequences rather than  
92 causes of tinnitus.

93 Our hypothesis implies that when processing auditory input, individuals with tinnitus  
94 should engage predictions more strongly, that is, either more accurately or anticipatory, compared  
95 with individuals without tinnitus. Recently we established a powerful experimental approach<sup>27</sup>  
96 showing in normal hearing individuals that more regular pure tone sequences activate  
97 tonotopically specific auditory templates in an anticipatory manner (see<sup>28,29</sup> for similar findings  
98 in the visual modality). In line with our predisposition framework, with increasing statistical  
99 regularities of sound sequences, individuals with tinnitus exhibited stronger anticipatory  
100 representations of upcoming stimuli.

101

## 102 **Results**

103 34 individuals with chronic tinnitus (16 females) took part in the experiment. For 25  
104 individuals in the Tinnitus group, age-matched volunteers without tinnitus (17 females) were

105 recruited for the purpose of group comparisons. Magnetoencephalography (MEG) was used to  
106 record neural activity while participants passively listened to sequences composed of pure tones  
107 at four different carrier frequencies. High temporal expectation was ensured by a strict rhythmic  
108 presentation at 3 Hz. While sound onsets were perfectly predictable, the probability of *which*  
109 carrier frequency would be presented (and thus could be predicted) was varied by parametrically  
110 modulating the regularity (i.e. predictability) of sound sequences across conditions (see **Figure 1a**  
111 and Methods for details). To investigate feature-specific predictive auditory processing also in  
112 absence of stimulation, sounds were omitted randomly in 10% of presentations. Tinnitus  
113 characteristics and tinnitus-related distress were assessed with online versions of standardised  
114 questionnaires (see Methods for details) shortly prior to the visit to the laboratory.

115 To measure the dynamics of auditory predictions we used multivariate pattern analysis  
116 (MVPA) to derive feature (carrier frequency) specific information from the MEG data. Following  
117 our previous study<sup>27</sup>, we trained classifiers to temporally decode the carrier frequency presented  
118 in the random sound sequence. These trained classifiers were subsequently tested on sound events  
119 in all regularity levels using time- and condition-generalization<sup>30</sup>. For each individual we  
120 quantified how decoding accuracy was modulated by the regularity condition by extracting the  
121 slope ( $\beta$  coefficients) from a linear regression analysis. These were compared between the groups,  
122 yielding a time-generalized representation of T-values (see **Figure 1**).

123  
124  
125  
126  
127

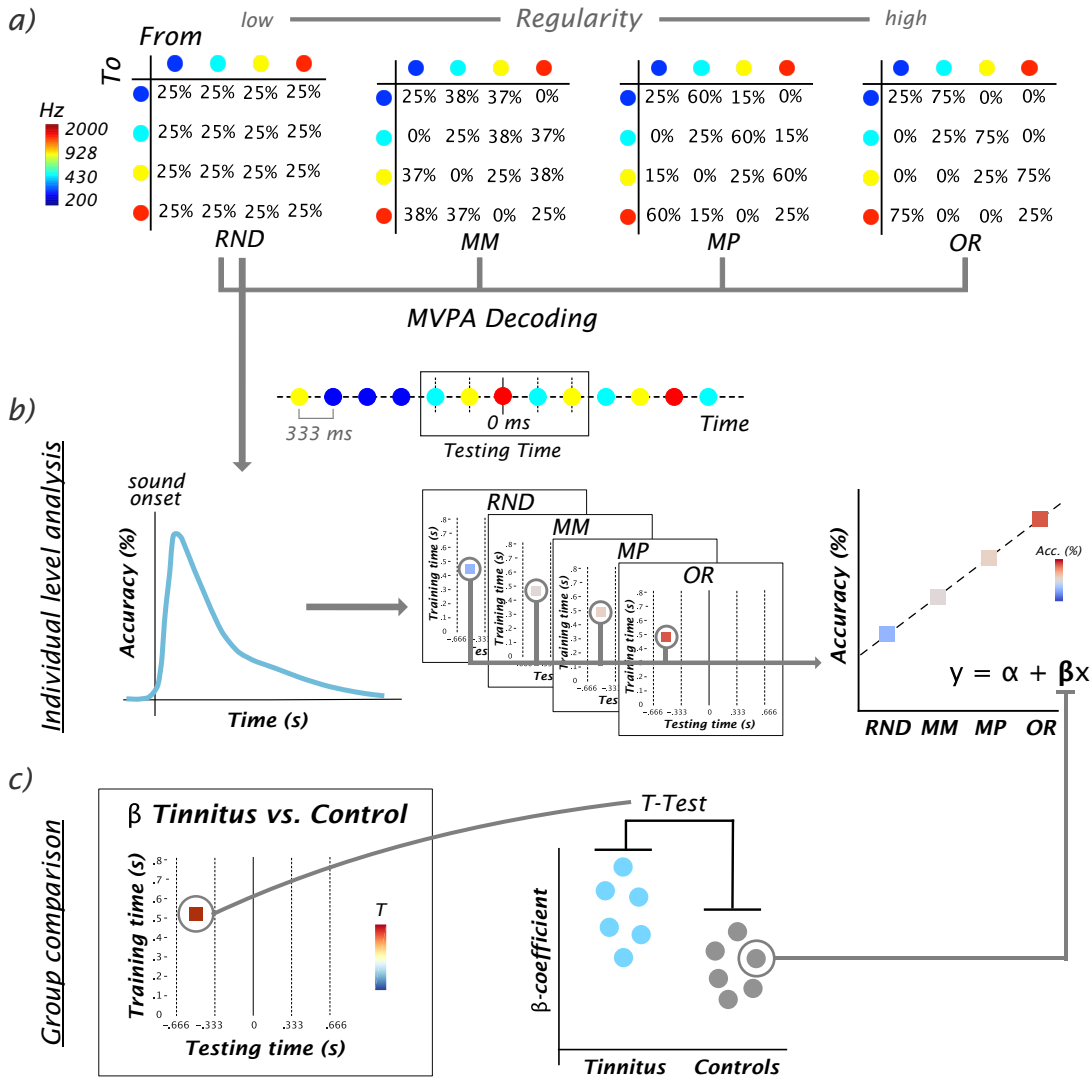

128  
129  
130  
131  
132  
133  
134  
135  
136  
137  
138

**Figure 1:** Experimental design and analysis rationale. a) Transition matrices used to generate sound sequences according to the different conditions (random [RD], midminus [MM], midplus [MP] and ordered [OR]) with a schematic example of a brief sound sequence. 10% of sound stimuli were randomly omitted. The “Testing Time” window corresponds to one trial with the to-be-decoded carrier frequency in the center (at 0 ms; marked by solid line), preceded and followed by two other tones (marked by dashed lines). b) For MVPA, time-shifted classifiers were trained on events in the random condition (left panel) and applied in a condition- and time-generalized manner to all conditions (middle panel). For every time-generalized data point, the dependence of decoding accuracy on the regularity of the sound sequence was quantified by a linear regression. c) At a group level, the resulting slopes ( $\beta$ -coefficients) of the regression analysis were compared between the tinnitus group and the control group.

### 139 **Normal neural encoding of carrier frequencies in tinnitus**

140 Sensor level MEG data was used to decode the four carrier frequencies presented in the  
 141 random sound sequence (**Figure 1a** and **b**). The trained classifiers were fundamental for targeting  
 142 the main question of whether feature specific predictions in the auditory system are engaged  
 143 differently in each of the groups in all further steps. In a first step, we could analyse the results of  
 144 the simple decoding analysis for the random condition. Since this condition did not contain  
 145 predictability-related information it allowed us to compare basic encoding of sound carrier

146 frequencies in individuals with tinnitus with the control group. Both groups exhibited a rapid  
147 increase of decoding accuracy following sound onset robustly observed at an individual level  
148 (**Figure 2a**). Above chance ( $p < .05$ , Bonferroni corrected) decoding accuracy started immediately  
149 after stimulus onset in both samples (note that sampling rate was at 100 Hz). While peak increases  
150 were reached at approximately 100 ms, decoding accuracy remained statistically significant above  
151 chance for approximately ~500-600 ms with some interindividual variability. Remarkably, given  
152 the passive and non-engaging nature of the experiment, this means that carrier frequency specific  
153 information remained available during the two subsequent sound presentations. Interestingly,  
154 accuracy transiently increased approximately 100 ms after the subsequent stimulus onset (i.e. 450-  
155 500 ms after the to-be-decoded sound). Descriptively a similar pattern was observed following the  
156 next but one stimulus, albeit at a much smaller magnitude. These observations may reflect a  
157 sustained activation and reactivation of an auditory short-term memory trace enabling the  
158 formation of associations between events in temporal proximity, which is fundamental for  
159 subsequent learning of statistical regularities.

160       Importantly, we found no differences between the tinnitus group and the control group  
161 when carrier frequencies were presented randomly (**Figure 2a**). Since the upper carrier frequency  
162 of 2 kHz was at or below the audiometric edge for the majority of individuals with tinnitus (see  
163 audiograms in Supplementary Material Appendix 1 and 2), superior decoding results could  
164 plausibly be expected in the case of an enlarged neural representation of non-deprived tone  
165 frequencies resulting from tonotopic changes<sup>7</sup>. Given the presence of hearing loss and potential  
166 tonotopic reorganization in individuals with tinnitus, the absence of a group difference in this  
167 simple carrier frequency decoding is of outstanding importance: that is, at a basic level individuals  
168 with tinnitus encode carrier frequencies equally well to individuals without tinnitus. This means  
169 that subsequently reported group differences are due to the manipulation of regularity (i.e.  
170 predictability) of the sound sequence.

171

172

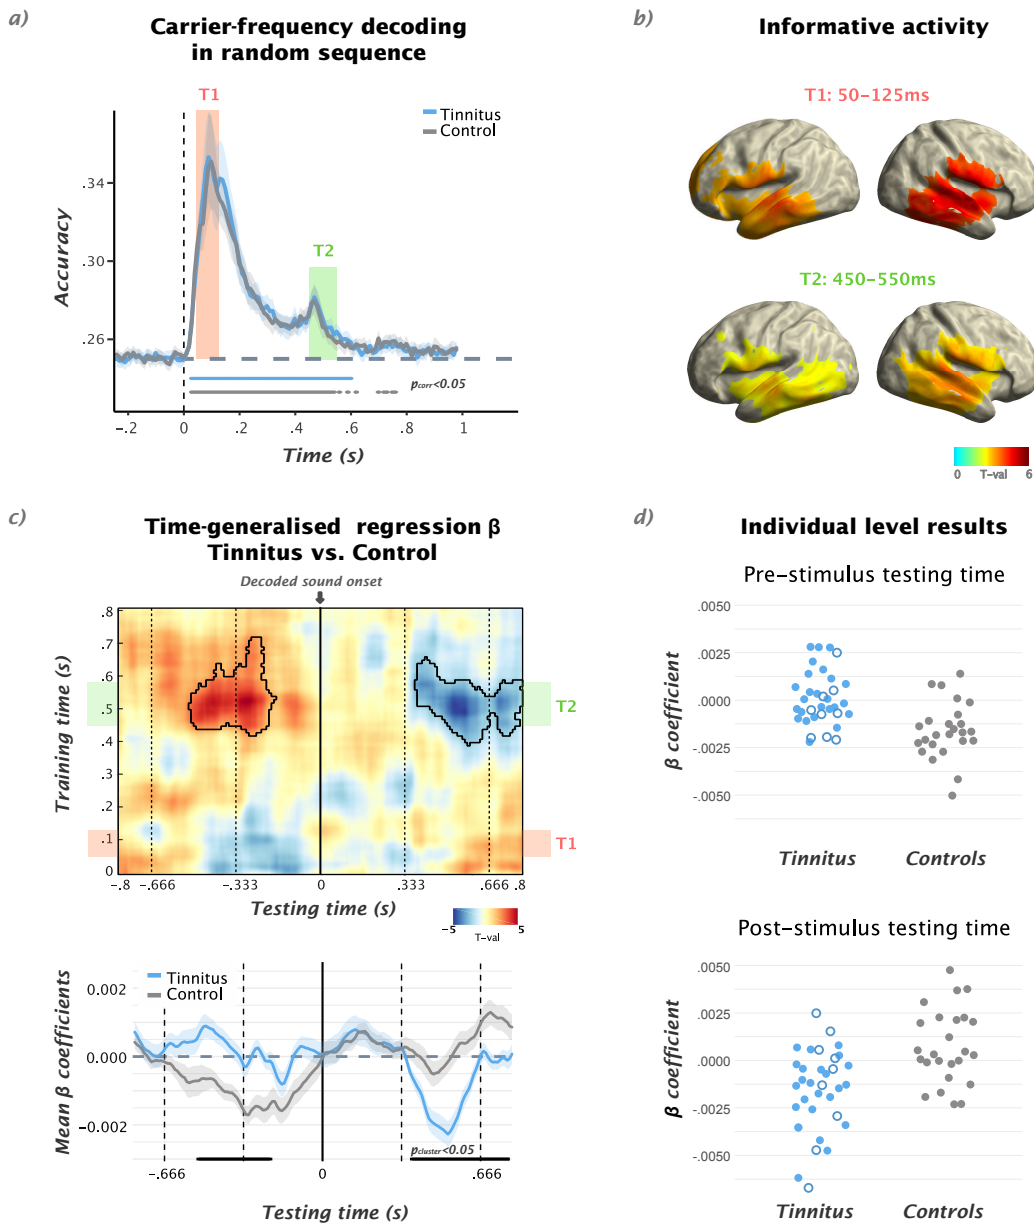

173

174

175

176

177

178

179

180

181

182

183

184

185

186

187

188

**Figure 2.** a) Temporal decoding of carrier frequencies in the random sound sequence for the tinnitus and control groups, respectively. In both groups, peak accuracy is reached after ~100 ms following sound onset. Above chance decoding accuracy is observed in a sustained manner up to ~600 ms ( $p < .05$ , Bonferroni corrected). No differences were observed between the groups. b) Source level depiction of Informative Activity for different periods: 50-125ms (T1) and 450-550ms (T2) after decoded sound presentation. The latter corresponds to the training time interval yielding pronounced group differences in the condition generalized analysis. c) (upper panel) Group comparison (see Figure 1c) of  $\beta$ -coefficient values between tinnitus vs. control groups in time-generalised matrix. Colors indicate t-values and solid black borders delimiting periods of significant difference ( $p < 0.05$ , cluster corrected). Lower panel: Time courses of  $\beta$ -coefficients averaged over 480-580ms training time-window, showing aforementioned effects driven by a relative increase of regularity-dependent carrier frequency specific activity prior to anticipated onset period and downregulation in the post-sound period in the tinnitus group. d) For illustration purposes, individual  $\beta$ -coefficient values within pre- and post-sound cluster are shown. While for the group comparison (shown in c) a subset of 25 individuals with tinnitus were taken into account, the full sample of 34 participants with tinnitus is displayed (individuals not considered in group comparison shown as hollow circles).



189 **Regularity-driven carrier frequency specific neural information strongly differs between**  
190 **tinnitus and control groups**

191 To adequately capture carrier-frequency specific, predictive-processing dynamics, we used  
192 a classifier trained on the random sound sequence (shown above) and applied it to all regularity  
193 levels in a time-generalized manner (**Figure 1a**). We used decoding accuracy as an indicator of  
194 the strength of internal representation of the particular stimulus frequency, and thus as a window  
195 into its utilisation in predictive processes. In order to quantify how the predictability of the carrier  
196 frequency modulates corresponding neural information, for each individual we calculated linear  
197 regressions (at each time-point over the entire temporal generalization matrix) between decoding  
198 accuracy and increasing regularity level (**Figure 1b**). In both groups, for the early training-time  
199 periods (~50-350 ms), similar patterns - in particular the anticipatory pre-activation of carrier  
200 frequency specific neural templates - were revealed as in the original experiment despite the  
201 slightly different analysis approach (see Supplementary Material **Figure S3**). For each point in the  
202 time-generalization matrix we compared the individual  $\beta$ -coefficients between groups using a t-  
203 test, reflecting differences in how carrier frequency specific predictions are modulated by the  
204 regularity of the sequence (**Figure 1c**).

205 Striking effects were obtained for relatively late training time intervals centred at around  
206 530 ms. For trials in which the decoded sound was presented at testing time 0 (**Figure 2c**), we  
207 identified a positive cluster ( $p = 0.038$ ) prior to the onset of the to-be-decoded event at  
208 approximately -530 ms to -200 ms, indicating a relatively stronger increase of decoding accuracy  
209 with regularity level for individuals with tinnitus. We interpret this as evidence of stronger correct  
210 anticipation of the present stimulus by individuals with tinnitus, in the higher regularity conditions  
211 where such anticipation is possible. We observed a similar effect in omission trials (see  
212 Supplementary Materials **Figure S5**). Time courses of  $\beta$ -coefficients averaged over the relevant  
213 late training time period (**Figure 2c**) showed that the intergroup differences were driven by  
214 opposing patterns: whereas individuals with tinnitus exhibited relatively increased carrier  
215 frequency specific information with stronger predictability prior to anticipated sound onsets,  
216 results for control individuals were marked by an augmenting absence (captured by the negative  
217  $\beta$ -coefficients) of the carrier frequency pattern anticipated at 0 ms. Following the sound onset, a  
218 negative cluster ( $p = 0.05$ ) between 360 ms and 800 ms was observed for the same training time  
219 interval. Similar to the prestimulus results, these post-sound onset effects are caused by inverse  
220 tendencies for the tinnitus and control groups (**Figure 2c**): that is, whereas individuals with tinnitus  
221 appeared to quickly deactivate carrier frequency patterns the more regular the sound sequence

222 became, control individuals reactivate patterns of the decoded sound presented at 0 ms upon  
223 presentation of new events.

224 In order to make sense of this seemingly complex picture, it is important to detail the  
225 stimulation structure in light of our analysis approach, which focused on representation of the  
226 present stimulus frequency presented at time 0. Differing sequence regularities did not change the  
227 probability of the stimulus frequency remaining the same from one stimulus to the next (fixed at  
228 0.25; i.e. diagonal of transition matrix), but increasing stimulus regularity did reduce the  
229 probability of the stimulus frequency remaining the same over separations of two or more stimuli.  
230 The observed regularity-related differences occurring from around two or more stimuli prior or  
231 subsequent to the present stimulus can be reconciled with the fact that relatively late training-time  
232 neural patterns capture this group-level effect. These patterns likely reflected processes associating  
233 sequential inputs, that is, short-term memory processes that integrate information over longer  
234 timescales. Our results suggest that in highly predictable sequences, control individuals engage  
235 these feature-specific auditory short-term processes in a more *reactive* way. Qualitatively this is  
236 similar to the manner they are activated in random sequences, that is, the stimulus that has just  
237 been heard is continuously represented and reactivated when new input arrives. Tinnitus  
238 individuals on the other hand exhibit a rather *proactive* engagement of the same processes with  
239 increasing regularity, preactivating stimulus representations in auditory short-term memory before  
240 their actual onset. Upon presentation of subsequent stimuli - which become less likely to be the  
241 same carrier frequency as presented at 0 - feature-specific neural patterns are downregulated.  
242 Overall, our results point to a dramatically altered involvement of higher level auditory short-term  
243 memory processes related to associating discrete events to form representations (“internal  
244 models”) of the statistical regularity of the sound sequence. These findings support the hypothesis  
245 that individuals with tinnitus utilize internal models in a more anticipatory manner when  
246 processing auditory events.

247

### 248 ***Regularity-dependent engagement of internal models is unrelated to the magnitude of*** 249 ***hearing loss and subjective tinnitus features***

250 Following the demonstration of a marked group difference in activating late carrier  
251 frequency-specific neural patterns as a function of sequence regularity, we tested whether the  
252 magnitude of this process was related to subjectively rated tinnitus characteristics as well as  
253 audiometric features. Across the full ( $N = 34$ ) tinnitus sample, we performed Spearman correlation  
254 between the averaged  $\beta$ -regression values corresponding in time to statistically significant

255 anticipatory positive and post-stimulus negative clusters and magnitude of hearing loss (HLS,  
256 measured by Tinnitus Questionnaire ), tinnitus loudness (TL) and tinnitus distress (TD) (see  
257 Supplementary Material **Figure S5**).

258 In spite of the explorative (liberal) testing without multiple comparison corrections, no  
259 significant correlation effects for any of these factors were identified for the prestimulus positive  
260 cluster ( HLS:  $\rho = -0.6, p = 0.75$ ; TL:  $\rho = -0.06, p = 0.73$ ; TD:  $\rho = 0.11, p = 0.53$ ) nor for  
261 the post-stimulus negative effect ( HLS:  $\rho = -0.13, p = 0.45$ ; TL:  $\rho = -0.01, p = 0.95$ ; TD:  $\rho$   
262  $= -0.14, p = 0.43$ ). The lack of relationships between prediction related neural effects with hearing  
263 loss add further support to the claim that the effects visible in group analysis are strictly regularity-  
264 dependent and not driven by low-level auditory processing. From a “neural correlate” perspective,  
265 the lack of correlation with tinnitus-specific (distress and loudness) measures would seem  
266 counterintuitive. However, this result is fully compatible with the predisposition view that we are  
267 advancing, proposing that individual predictive processing tendencies are relevant for the  
268 emergence and stabilization of tinnitus.

269

## 270 **Discussion**

271 Current “neural correlate”-based approaches of tinnitus are insufficient to explain the  
272 interindividual varying trajectories that lead some individuals to develop (chronic) tinnitus  
273 following hearing damage but not others. Our predictive processing predisposition framework  
274 relies on inter-individual trait differences in applying internal models in the auditory system.  
275 Vulnerability to developing (chronic) tinnitus may arise from stronger tendencies to process  
276 incoming sounds according to internal model-based predictions: These tendencies could both refer  
277 to absolute strength (precision) or altered temporal dynamics (i.e. becoming more anticipatory) of  
278 auditory predictions. The individual’s predictive processing tendency could lead to different  
279 clinical outcomes when faced with potentially tinnitus-inducing events such as increased  
280 spontaneous activity and/or synchrony in the auditory pathway that follows hearing damage or  
281 noise overexposure. For instance, individuals better able to predict the dynamics of this  
282 spontaneous activity over time would form stronger predictions of it, thus facilitating its perception  
283 as an auditory entity through altered predictions<sup>21</sup>. However, other frameworks that emphasize the  
284 importance of top-down control of auditory activity to play a role in tinnitus generation (e.g. <sup>31</sup>)  
285 are also compatible with our predisposition concept. In a first necessary step towards establishing  
286 support for this novel framework, we compared individuals with chronic tinnitus and controls

287 without tinnitus, utilizing an approach<sup>27</sup> that allows us to scrutinize feature-specificity of  
288 predictive processes in the auditory system at high temporal resolution. In contrast to “neural  
289 correlate” approaches, no special importance was placed on the tinnitus frequency. Our main  
290 findings are: 1) basic processing of carrier frequencies is not altered in tinnitus; 2) higher-level  
291 (short-term memory-based) processing of carrier frequency exhibit a stronger anticipatory pattern  
292 in individuals with tinnitus as compared to controls; 3) the latter pattern is not correlated to factors  
293 such as magnitude of hearing loss or tinnitus-related variables (distress and loudness), in line with  
294 the idea that they reflect a more general predictive processing tendency of the individual.

295 Our approach to identifying modulation of feature-specific auditory activity as a function  
296 of predictability (set by the regularity of the sequence) used training classifiers to decode carrier  
297 frequencies in the random sound sequence. While our framework would predict strongest  
298 differences in situations when reliable internal models can be formed, it was important to also  
299 scrutinize processing of carrier frequencies when precise predictions cannot be made. Differences  
300 could be plausibly expected since most individuals with tinnitus exhibit some hearing loss at higher  
301 frequencies putatively leading to cortical reorganization: In particular an expanded representation  
302 of non-damaged cochlear regions<sup>7</sup> and potential improved sensory processing thereof<sup>32</sup> could  
303 imply an improved decoding performance in the random sequence. However, the temporal  
304 decoding patterns were virtually identical for both groups, with the characteristic features  
305 elaborated on in our previous report<sup>27</sup> (e.g. the rapid onset and relatively sustained above-chance  
306 decoding performance outlasting subsequent tone presentations). The lack of a group difference is  
307 overall in line with findings indicating no abnormal tonotopic representation in tinnitus<sup>33</sup> in  
308 contrast to earlier reports<sup>34</sup>. Making a stronger point on this issue would require establishing that  
309 decoding performance in the random sequence can be taken as a quantitative proxy for tonotopic  
310 representation. Importantly for the current study, all group differences we reported result not from  
311 low-level, feedforward activation of tonotopically neural ensembles, but from adding varying  
312 levels of regularity to the sound sequence.

313 Indeed, striking regularity-dependent group differences were observed, with rich temporal  
314 information that can only be uncovered using high-temporal resolution methods: Firstly, while the  
315 general peak of decoding accuracy occurred at ~100 ms and in these early training-time windows  
316 exhibited a positive relationship with regularity (see Figure S3 in Supplementary materials) as  
317 described in<sup>27</sup>, these early periods did *not* capture group differences. For late training-time  
318 intervals, however, marked group differences were observed. Interestingly, the relevant training  
319 time interval is ~150 ms after the onset of the sound following the to-be-decoded sound. This late

320 increased accuracy for decoding carrier frequencies in the random sequence indicates a  
321 reactivation of a short-term memory representation of carrier frequency specific information  
322 presented at 0 ms (see also the descriptive similarity of Informative Activity patterns for early and  
323 late periods in **Figure 2b**). This process leads to a co-activation of new with previous input, which  
324 is crucial for associating discrete events via Hebbian principles. These learned associations are  
325 crucial for building up an internal model of the statistical regularities underlying the generation of  
326 the sound sequence. The selective involvement of these late processes in terms of group differences  
327 points to the role of high-level (memory based) auditory processes contributing to (or  
328 predisposing) tinnitus beyond purely bottom-up driven processes. An open question however  
329 remains as to whether these differences would be seen without the reactivation caused by a  
330 subsequent sound. A study systematically varying the ISI would be needed to resolve this issue,  
331 showing whether the latency of effects would remain relatively stable or follow the temporal  
332 separation of events.

333 Secondly, the temporal resolution of MEG allowed us to precisely describe the temporal  
334 dynamics of how these higher level auditory processes are engaged in the context of different  
335 levels of regularity of the sound sequence and how they differ between the groups (**Figure 2c**).  
336 Effects were dependent on whether the time-window of investigation (testing time) was prior to or  
337 following the onset of the to-be-decoded sound (testing time at 0 ms). Both groups showed an  
338 immediate engagement of these short-term memory-related auditory processes following the  
339 (perfectly predictable in time) sound onset. At later intervals (~600 ms), coinciding with the onset  
340 of the second sound following the to-be-decoded sound, decoding accuracy increased in the control  
341 group with increasing regularity of the sequence (see **Figure 2c**). The pattern was *reactive* in the  
342 sense that in periods prior to the anticipated onset of the to-be-decoded sound, carrier frequency  
343 specific information was less present with increasingly regular sounds. This indicates that short-  
344 term memory related auditory processes are engaged only once a predicted sound is presented,  
345 potentially contributing to a continuous update and stabilization of a formed internal model.  
346 Individuals with tinnitus, however, show an almost mirror-image pattern to the control group, with  
347 stronger anticipatory engagement of short-term memory related auditory processes when the  
348 sequence becomes more regular. Following the anticipated onset of a more predictable sound  
349 (carrier frequency) a marked disengagement of the relevant carrier frequency specific neural  
350 patterns is observed: this could be partially driven by processing the sound presented at 333 ms or  
351 anticipating the sound presented at 666 ms, both (usually) differing from the one presented at 0 ms  
352 in regular sequences. Irregardless, the results point to a dramatic difference with respect to internal

353 models utilization between individuals with tinnitus and the control group. Overall, the more  
354 anticipatory pattern in tinnitus is in line with our belief that stronger predictive processing  
355 tendencies could identify individuals vulnerable to developing tinnitus. On a broader level the  
356 observed effects are also in accord with reports linking strong priors to general proneness to  
357 auditory hallucinations, even though a link between our data and those derived from computational  
358 modeling of behavioral data would need to be established. Also in contrast to a previous study  
359 supporting this notion <sup>26</sup>, we derive our conclusions from neural data obtained during passive  
360 sound processing without experimentally inducing illusory percepts. The simplicity of our  
361 approach may be useful for studying altered predictive processing in other clinical groups,  
362 including ones in which behavioral assessment is challenging <sup>35</sup>.

363         Albeit striking in terms of strength, the group effects reported here do not conclusively  
364 confirm a core idea that we are advancing, namely that increased internal model utilization  
365 tendencies in the auditory system predispose development of tinnitus. The absence of correlations  
366 with variables associated with tinnitus-induction (e.g. hearing loss) or consequences of tinnitus  
367 (e.g. loudness or distress), supports the view that the predictive processes we observe using our  
368 approach could be a temporally more stable “trait-like” feature of the individual. However, strong  
369 evidence would ultimately require longitudinal studies in humans ideally starting measurements  
370 prior to onset of (chronic) tinnitus, which is challenging (for an approach to inducing transient  
371 tinnitus see <sup>4</sup>). Thus a next step may be to apply this paradigm in animal models of (chronic)  
372 tinnitus, where inter-animal variability has also been reported (e.g. <sup>36</sup>). Such an approach should  
373 be relatively straightforward since the paradigm does not require any task for which the animal  
374 needs to be trained. Also when neural recording is performed using multiple electrodes, large parts  
375 of the analysis described here could be applied.

376         To summarize, we show for the first time enhanced anticipatory engagement of feature-  
377 specific high-level (putatively short-term memory based) predictive auditory processing in  
378 individuals experiencing chronically auditory phantom perception - tinnitus. However, whether  
379 this pattern constitutes a predisposing factor or is a consequence of tinnitus onset (despite being  
380 uncorrelated to tinnitus-relevant features) remains to be addressed in future studies. Resolving this  
381 issue has far-reaching consequences on a conceptual level by narrowing the explanatory gap of  
382 who will develop tinnitus following hearing damage. Also on a clinical level our work could have  
383 important implications, by potentially being able to identify individuals with greater risk of  
384 developing (chronic) tinnitus, thereby enabling more focused prevention or treatment efforts.

385

## 386 **Materials and methods**

387

### 388 **Participants**

389 A total of 34 individuals with tinnitus (17 females, 20-67 years old, *mean age*=45.12,  
390 *sd*=13.65) participated in the experiment: 25 (16 females, 20-66 years old, *mean age*= 40.92,  
391 *sd*=13.17) were age-matched (in all cases but one both age- and sex- matched) with the control  
392 group and used for group comparisons. Tinnitus related questionnaires (German version of  
393 *Tinnitus Questionnaire*, TQ;<sup>37</sup>, *Tinnitus Sample Case History Questionnaire*, TSCHQ<sup>41</sup> and 10-  
394 point scale *Tinnitus Severity*, TS) were collected for individuals with tinnitus. Standardized pure-  
395 tone audiometric testing for frequencies from 125Hz to 8kHz was performed in 31 out of 34  
396 tinnitus participants using Interacoustic AS608 audiometer. 25 volunteers (17 females, 21-65 years  
397 old, *mean age*=41.56, *sd*=13.68) reporting no relevant audiological, neurological or psychiatric  
398 treatment history took part as a control group. 12 of the group were part of an experiment published  
399 elsewhere<sup>27</sup>. Control subjects were age-matched to each tinnitus participant by the +/-3 years  
400 criterion, selecting the closest match in cases where more than one subject was eligible. No  
401 differences were shown for age between the samples comprised in the intergroup analysis ( $t =$   
402  $0.17$ ,  $p = 0.89$ ). All participants provided written informed consent prior to participating. The  
403 experimental protocol was approved by the ethics committee of the University of Salzburg (EK-  
404 GZ: 22/2016 with Addenda).

405

### 406 **Stimuli and experimental procedure**

407 Five head position indicator (HPI) coils were applied on the scalp of the subjects prior to  
408 entering the MEG shielded chamber. The Polhemus FASTRAK (Polhemus, Colchester, Vermont,  
409 U.S.A) digitizer was used to digitize head shape and position for each individual via marking of  
410 anatomical references (nasion and left/right pre-auricular points), location of HPI coils and  
411 approximately 300 additional points over the scalp. Before the start of the actual paradigm, a 5  
412 min resting state recording was performed (not reported here), when subjects were asked to simply  
413 look at the center of the rear-projection screen.

414 During the experiment, participants watched a silent movie (“Cirque du Soleil: Worlds  
415 Away”), while passively being exposed to different tone sequences (**Figure 1a**). No instruction  
416 considering the sound stimuli was provided. The movie was displayed on the screen inside the  
417 shielded room using a projector (PROPIXX, VPixx technologies, Canada) and a periscope,

418 whereas auditory stimulation was delivered to both ears via MEG-compatible pneumatic in-ear  
419 headphones (SOUNDPixx, *ibid*). Four different pure (sinusoidal) tones were presented, with  
420 carrier frequencies logarithmically spaced between 200 to 2000 Hz (200 Hz, 431 Hz, 928 Hz, 2000  
421 Hz). Each of the tones lasted 100 ms, tapered with 5 ms linearly ascending/descending periods at  
422 both ends. Sounds were presented at a constant 3Hz stimulation rate.

423 Each participant was presented four blocks of tone sequences comprising 4000 stimuli,  
424 each lasting approximately 22 mins. The number of particular tone frequencies was balanced  
425 across blocks, so the condition-blocks varied solely by presentation order, which was  
426 parametrically modulated in their regularity (entropy) level using different transition matrices<sup>42</sup>.  
427 In the random condition (RD, highest entropy or lowest regularity; see **Figure 1a**) there was an  
428 equal transition probability from one sound to another (thus preventing any possibility of  
429 accurately predicting an upcoming stimulus). Conversely, in the ordered condition (OR, lowest  
430 entropy level or highest regularity), presentation of one sound was for the majority (75% of cases)  
431 systematically followed by the particular other sound. Additionally, two intermediate entropy  
432 conditions were included, labelled here as midminus (MM) and midplus (MP). To control for the  
433 influence of self-repetitions, the diagonal of the transition matrices was set to be always 25% across  
434 all entropy conditions. The experiment was written using the MATLAB (ver. 9.1 The MathWorks,  
435 Natick, Massachusetts, U.S.A) based Psychophysics Toolbox<sup>43</sup>.

436

### 437 ***MEG data acquisition and preprocessing***

438 Brain magnetic activity was measured using a whole-head MEG (Triux, MEGIN Oy,  
439 Finland), sampling the signal at 1000 Hz and with the default hardware filters set by the  
440 manufacturer (0.1 Hz high pass - 330 Hz low pass). Subjects were comfortably seated inside a  
441 dimly lit magnetically shielded room (AK3b, Vacuumschmelze, Germany). Signals were captured  
442 by 102 magnetometers and 204 planar gradiometers placed in 102 different positions. We used a  
443 signal space separation algorithm (SSS<sup>44</sup>) implemented in the Maxfilter program (version 2.2.15)  
444 to attenuate external noise from the MEG signal (mainly 16.6Hz, and 50Hz plus harmonics) and  
445 realign data to a common standard head position (“-trans default” Maxfilter parameter) across  
446 different blocks based on the measured head position at the beginning of each block<sup>45</sup>. The rest of  
447 the subsequent analysis was performed on magnetometers only, given the mixing of information  
448 between the two sensors types after the Maxfilter step<sup>46</sup>.



449 Data analysis was carried out with scripts written in-house, using the Fieldtrip toolbox<sup>47</sup>  
450 (git version 20170919). First a high-pass filter at 0.1 Hz (6th order zero-phase Butterworth filter)  
451 was applied to the raw data. Then, the continuous data were chunked in 10 s blocks, down-sampled  
452 to 256 Hz, and used as input to an Independent Component Analysis (ICA) algorithm. The ICA  
453 components were visually inspected to find eye blinks, eye movements, heartbeat and 16 $\frac{2}{3}$  Hz  
454 (German/Austrian train power supply) artifacts. Finally, the continuous data were epoched from 1  
455 s before to 1 s after target sound/omission onset and the artifactual components projected out (mean  
456  $3.6 \pm 1.2$  SD) components removed on average per each subject). All trials were kept using these  
457 preprocessing steps<sup>45</sup>. A further 30 Hz low pass filter (6th order zero-phase Butterworth filter) and  
458 100 Hz resampling were applied to the epochs, before continuing with the multivariate pattern  
459 analysis (MVPA).  
460

#### 461 **Multivariate Pattern Analysis (MVPA) and classifier weights projection.**

462 We used MVPA as implemented in the MVPA-Light ([https://github.com/treder/MVPA-](https://github.com/treder/MVPA-Light)  
463 [Light](https://github.com/treder/MVPA-Light), commit 003a7c), forked and modified in order to extract the classifier weights  
464 (<https://github.com/gdemarchi/MVPA-Light/tree/devel>). In essence, we implemented the analysis  
465 of carrier frequency decoding separately for sound and omission trials (*sound-to-sound* decoding  
466 and *sound-to-omission* decoding, respectively). We defined four targets (classes) for the decoding  
467 related to the carrier frequency of the sound presented in each trial. In order to focus solely on  
468 neural templates corresponding to carrier frequency-related information and avoid any potential  
469 carry over effect from the previous sound, the classifier was trained only on the random (RD)  
470 sounds and the preceding tone frequencies were balanced across trials. The exact details of the  
471 MVPA analysis have been described elsewhere<sup>25</sup>. An identical procedure was applied to sound-  
472 to-omission decoding (see Figure S4 in Supplementary materials). We trained a multiclass LDA  
473 classifier on each sample point of the random (RD) condition and tested on all regularity level  
474 conditions for each time point of the testing set using a temporal generalization method<sup>30</sup>. This  
475 enabled classifiers to generalize to each point in a time-shifted manner. Given the cross decoding  
476 nature of this approach, no cross-validation was performed, except for the testing on random (RD)  
477 tones, where a 5-fold cross validation, repeated five times, was implemented. For the sound-to-  
478 sound and sound-to-omission decoding, time generalization was calculated for each entropy level  
479 separately, resulting in four generalization matrices, one for each entropy level. For each subject,  
480 classification accuracy was then averaged at the group comparison level. Finally, and mainly for

481 depiction purposes, the training decoders weights were extracted and projected in the source space,  
482 to localize the informative activity (see **Figure 2b**) related to carrier-frequency processing<sup>27,48</sup>.  
483

#### 484 **Statistical analysis**

485 As a first step, we extracted the dependence on entropy level within tinnitus and control  
486 groups. We arranged accuracy results for sounds from random to ordered and we then computed  
487 a regression for each single point of the testing-training 2D accuracy matrices, using the MATLAB  
488 built in least square *mldivide* algorithm (“\”), resulting in a training time by testing time matrix of  
489 slopes (“ $\beta$ ”) for each subject, discarding intercepts. To compare the groups (25 Tinnitus subjects  
490 vs 25 age matched controls), we ran a t-test between the two matrices with coefficients obtained  
491 in the regression step, inputting them in the form of time-frequency 2D structures (time-  
492 generalised  $\beta$  values) in the `ft_freqstatistics` fieldtrip function. In order to account for multiple  
493 comparisons, we used a nonparametric cluster permutation test<sup>49</sup>, with 1000 permutations and a  $p$   
494  $< 0.05$  to threshold the clusters.

495 We pursued further analysis with questionnaire data using R<sup>50</sup>. In the whole sample of  
496 participants with tinnitus (*Tinnitus Ws*, N=34) we performed a Spearman correlation of the  $\beta$ -  
497 coefficient values corresponding to the time-point of the maximum and the minimum t-value in  
498 intergroup analysis (comprised in positive and negative significant clusters emerging in group  
499 comparison for sound trials, see **Figure 2c**) with hearing loss (averaged audiogram for both ears),  
500 tinnitus loudness (10-point scale) and tinnitus distress scores (TQ). (see Supplementary Material  
501 **Figure S5**).

502  
503  
504

#### 505 **Acknowledgements**

506 We thank Mr. Manfred Seifter for the help with the measurements and Miss Hayley Prins  
507 for proofreading it.

508 This research is a part of the European School for Interdisciplinary Tinnitus Research project and  
509 has received funding from the European Union’s Horizon research and Innovation programme  
510 under the Marie Skłodowska-Curie grant agreement number 722046.

511

## 512 **References**

- 513 1. Shargorodsky, J., Curhan, G. C. & Farwell, W. R. Prevalence and Characteristics of Tinnitus  
514 among US Adults. *Am. J. Med.* **123**, 711–718 (2010).
- 515 2. Bhatt, J. M., Lin, H. W. & Bhattacharyya, N. Prevalence, Severity, Exposures, and Treatment  
516 Patterns of Tinnitus in the United States. *JAMA Otolaryngol.-- Head Neck Surg.* **142**, 959–965  
517 (2016).
- 518 3. Meyer, M., Luethi, M. S., Neff, P., Langer, N. & Büchi, S. Disentangling Tinnitus Distress  
519 and Tinnitus Presence by Means of EEG Power Analysis. *Neural Plasticity*  
520 <https://www.hindawi.com/journals/np/2014/468546/> (2014) doi:10.1155/2014/468546.
- 521 4. Schaette, R., Turtle, C. & Munro, K. J. Reversible Induction of Phantom Auditory Sensations  
522 through Simulated Unilateral Hearing Loss. *PLOS ONE* **7**, e35238 (2012).
- 523 5. Weisz, N., Hartmann, T., Dohrmann, K., Schlee, W. & Norena, A. High-frequency tinnitus  
524 without hearing loss does not mean absence of deafferentation. *Hear. Res.* **222**, 108–114  
525 (2006).
- 526 6. Schaette, R. & McAlpine, D. Tinnitus with a Normal Audiogram: Physiological Evidence for  
527 Hidden Hearing Loss and Computational Model. *J. Neurosci.* **31**, 13452–13457 (2011).
- 528 7. Eggermont, J. J. & Roberts, L. E. The neuroscience of tinnitus. *Trends Neurosci.* **27**, 676–682  
529 (2004).
- 530 8. De Ridder, D. *et al.* An integrative model of auditory phantom perception: Tinnitus as a  
531 unified percept of interacting separable subnetworks. *Neurosci. Biobehav. Rev.* **44**, 16–32  
532 (2014).
- 533 9. Weisz, N. *et al.* The Neural Code of Auditory Phantom Perception. *J. Neurosci.* **27**, 1479–  
534 1484 (2007).
- 535 10. Schaette, R. Tinnitus in men, mice (as well as other rodents), and machines. *Hear. Res.*  
536 **311**, 63–71 (2014).

- 537 11. Roberts, L. E. & Salvi, R. Overview: Hearing loss, tinnitus, hyperacusis, and the role of  
538 central gain. *Neuroscience* (2019) doi:10.1016/j.neuroscience.2019.03.021.
- 539 12. Haegens, S., Nacher, V., Luna, R., Romo, R. & Jensen, O. -Oscillations in the monkey  
540 sensorimotor network influence discrimination performance by rhythmical inhibition of  
541 neuronal spiking. *Proc. Natl. Acad. Sci.* **108**, 19377–19382 (2011).
- 542 13. Leske, S. *et al.* The strength of alpha and beta oscillations parametrically scale with the  
543 strength of an illusory auditory percept. *NeuroImage* **88**, 69–78 (2014).
- 544 14. Müller, N. *et al.* You can't stop the music: Reduced auditory alpha power and coupling  
545 between auditory and memory regions facilitate the illusory perception of music during noise.  
546 *NeuroImage* **79**, 383–393 (2013).
- 547 15. Elgoyhen, A. B., Langguth, B., De Ridder, D. & Vanneste, S. Tinnitus: perspectives from  
548 human neuroimaging. *Nat. Rev. Neurosci.* **16**, 632–642 (2015).
- 549 16. Adjamian, P. The application of electro- and magneto-encephalography in tinnitus  
550 research - methods and interpretations. *Front. Neurol.* **5**, 228 (2014).
- 551 17. Sedley, W. Tinnitus: Does Gain Explain? *Neuroscience* **407**, 213–228 (2019).
- 552 18. Martines, F., Bentivegna, D., Martines, E., Sciacca, V. & Martinciglio, G. Assessing  
553 audiological, pathophysiological and psychological variables in tinnitus patients with or  
554 without hearing loss. *Eur. Arch. Otorhinolaryngol.* **267**, 1685–1693 (2010).
- 555 19. Goman, A. M. & Lin, F. R. Prevalence of Hearing Loss by Severity in the United States.  
556 *Am. J. Public Health* **106**, 1820–1822 (2016).
- 557 20. Nondahl, D. *et al.* Generational Differences in the Reporting of Tinnitus. *Ear Hear.* **33**,  
558 640–644 (2012).
- 559 21. Sedley, W., Friston, K. J., Gander, P. E., Kumar, S. & Griffiths, T. D. An Integrative  
560 Tinnitus Model Based on Sensory Precision. *Trends Neurosci.* **39**, 799–812 (2016).
- 561 22. Von Helmholtz, H. *Handbuch der physiologischen Optik.* vol. 9 (Voss, 1867).

- 562 23. Sedley, W., Alter, K., Gander, P. E., Berger, J. & Griffiths, T. D. Exposing pathological  
563 sensory predictions in tinnitus using auditory intensity deviant evoked responses. *J. Neurosci.*  
564 *Off. J. Soc. Neurosci.* (2019) doi:10.1523/JNEUROSCI.1308-19.2019.
- 565 24. Corlett, P. R. *et al.* Hallucinations and Strong Priors. *Trends Cogn. Sci.* (2018)  
566 doi:10.1016/j.tics.2018.12.001.
- 567 25. Teufel, C. *et al.* Shift toward prior knowledge confers a perceptual advantage in early  
568 psychosis and psychosis-prone healthy individuals. *Proc. Natl. Acad. Sci. U. S. A.* **112**,  
569 13401–13406 (2015).
- 570 26. Powers, A. R., Mathys, C. & Corlett, P. R. Pavlovian conditioning–induced  
571 hallucinations result from overweighting of perceptual priors. *Science* **357**, 596–600 (2017).
- 572 27. Demarchi, G., Sanchez, G. & Weisz, N. Automatic and feature-specific prediction-related  
573 neural activity in the human auditory system. *Nat. Commun.* **10**, 3440 (2019).
- 574 28. Kok, P., Mostert, P. & de Lange, F. P. Prior expectations induce prestimulus sensory  
575 templates. *Proc. Natl. Acad. Sci.* **114**, 10473–10478 (2017).
- 576 29. Smith, F. W. & Muckli, L. Nonstimulated early visual areas carry information about  
577 surrounding context. *Proc. Natl. Acad. Sci. U. S. A.* **107**, 20099–20103 (2010).
- 578 30. King, J.-R. & Dehaene, S. Characterizing the dynamics of mental representations: the  
579 temporal generalization method. *Trends Cogn. Sci.* **18**, 203–210 (2014).
- 580 31. Rauschecker, J. P., Leaver, A. M. & Mühlau, M. Tuning Out the Noise: Limbic-Auditory  
581 Interactions in Tinnitus. *Neuron* **66**, 819–826 (2010).
- 582 32. Thai-Van, H., Micheyl, C., Norena, A. & Collet, L. Local improvement in auditory  
583 frequency discrimination is associated with hearing-loss slope in subjects with cochlear  
584 damage. *Brain J. Neurol.* **125**, 524–537 (2002).
- 585 33. Langers, D. R. M., de Kleine, E. & van Dijk, P. Tinnitus does not require macroscopic  
586 tonotopic map reorganization. *Front. Syst. Neurosci.* **6**, 2 (2012).

- 587 34. Mühlnickel, W., Elbert, T., Taub, E. & Flor, H. Reorganization of auditory cortex in  
588 tinnitus. *Proc. Natl. Acad. Sci.* **95**, 10340–10343 (1998).
- 589 35. Brima, T. *et al.* Auditory sensory memory span for duration is severely curtailed in  
590 females with Rett syndrome. *Transl. Psychiatry* **9**, 130 (2019).
- 591 36. Ahlf, S., Tziridis, K., Korn, S., Strohmeyer, I. & Schulze, H. Predisposition for and  
592 Prevention of Subjective Tinnitus Development. *PLoS ONE* **7**, e44519 (2012).
- 593 37. Goebel, G. & Hiller, W. Psychische Beschwerden bei chronischem Tinnitus: Erprobung  
594 und Evaluation des Tinnitus-Fragebogens (TF). *Verhaltenstherapie* **2**, 13–22 (1992).
- 595 38. Newman, C. W., Jacobson, G. P. & Spitzer, J. B. Development of the Tinnitus Handicap  
596 Inventory. *Arch. Otolaryngol. Head Neck Surg.* **122**, 143–148 (1996).
- 597 39. Meikle, M. B. *et al.* The tinnitus functional index: development of a new clinical  
598 measure for chronic, intrusive tinnitus. *Ear Hear.* **33**, 153–176 (2012).
- 599 40. Henry, J. A. *et al.* Tinnitus Functional Index: Development, validation, outcomes  
600 research, and clinical application. *Hear. Res.* **334**, 58–64 (2016).
- 601 41. Langguth, B. *et al.* Consensus for tinnitus patient assessment and treatment outcome  
602 measurement: Tinnitus Research Initiative meeting, Regensburg, July 2006. *Prog. Brain Res.*  
603 **166**, 525–536 (2007).
- 604 42. Nastase, S., Iacovella, V. & Hasson, U. Uncertainty in visual and auditory series is coded  
605 by modality-general and modality-specific neural systems. *Hum. Brain Mapp.* **35**, 1111–1128  
606 (2014).
- 607 43. Brainard, D. H. The Psychophysics Toolbox. *Spat Vis* **10**, 433–436 (1997).
- 608 44. Taulu, S. & Kajola, M. Presentation of electromagnetic multichannel data: The signal  
609 space separation method. *J. Appl. Phys.* **97**, 124905 (2005).
- 610 45. Cichy, R. M. & Pantazis, D. Multivariate pattern analysis of MEG and EEG: A  
611 comparison of representational structure in time and space. *NeuroImage* **158**, 441–454 (2017).

- 612 46. Garcés, P., López-Sanz, D., Maestú, F. & Pereda, E. Choice of magnetometers and  
613 gradiometers after signal space separation. *Sens. Switz.* **17**, 2926 (2017).
- 614 47. Oostenveld, R., Fries, P., Maris, E. & Schoffelen, J. M. FieldTrip: Open source software  
615 for advanced analysis of MEG, EEG, and invasive electrophysiological data. *Comput. Intell.*  
616 *Neurosci.* **2011**, (2011).
- 617 48. Marti, S. & Dehaene, S. Discrete and continuous mechanisms of temporal selection in  
618 rapid visual streams. *Nat. Commun.* **8**, (2017).
- 619 49. Maris, E. & Oostenveld, R. Nonparametric statistical testing of EEG-and MEG-data. *J.*  
620 *Neurosci. Methods* **164**, 177–190 (2007).
- 621 50. Team, R. C. R: A language and environment for statistical computing. (2013).
- 622
- 623
- 624
- 625
- 626
- 627
- 628
- 629
- 630
- 631
- 632
- 633
- 634

## ***Supplementary Materials***



|                                                          |                     |              |               |             |           |                     |
|----------------------------------------------------------|---------------------|--------------|---------------|-------------|-----------|---------------------|
| <b>Gender (n)</b>                                        | <i>Tinnitus Cmp</i> | <b>total</b> | <b>m</b>      | <b>f</b>    |           |                     |
|                                                          | <i>Controls</i>     | 25           | 9             | 16          |           |                     |
|                                                          | <i>Tinnitus Ws</i>  | 25           | 8             | 17          |           |                     |
|                                                          |                     | 34           | 18            | 16          |           |                     |
| <b>Age (years)</b>                                       | <i>Tinnitus Cmp</i> | <b>n</b>     | <b>median</b> | <b>mean</b> | <b>sd</b> |                     |
|                                                          | <i>Controls</i>     | 25           | 42            | 40.92       | 13.17     |                     |
|                                                          | <i>Tinnitus Ws</i>  | 25           | 43            | 41.56       | 13.68     |                     |
|                                                          |                     | 34           | 47.5          | 45.12       | 13.65     |                     |
| <hr/>                                                    |                     |              |               |             |           |                     |
| <b>Audiometry</b><br><i>(averaged thresholds, dB HL)</i> |                     | <b>n</b>     | <b>median</b> | <b>mean</b> | <b>sd</b> | <b>distribution</b> |
| <b>125Hz-2kHz R</b>                                      | <i>Tinnitus Cmp</i> | 23           | 14            | 16.91       | 11.58     |                     |
|                                                          | <i>Tinnitus Ws</i>  | 31           | 15            | 17.9        | 12.93     |                     |
| <b>125Hz-2kHz L</b>                                      | <i>Tinnitus Cmp</i> | 23           | 12            | 12.65       | 7.02      |                     |
|                                                          | <i>Tinnitus Ws</i>  | 31           | 12            | 12.81       | 7.01      |                     |
| <b>125Hz-2kHz R+L</b>                                    | <i>Tinnitus Cmp</i> | 23           | 13.5          | 14.78       | 7.84      |                     |
|                                                          | <i>Tinnitus Ws</i>  | 31           | 13.5          | 15.35       | 8.89      |                     |
| <b>4kHz-8kHz R</b>                                       | <i>Tinnitus Cmp</i> | 23           | 13.33         | 18.26       | 18.69     |                     |
|                                                          | <i>Tinnitus Ws</i>  | 31           | 16.67         | 23.01       | 22.67     |                     |
| <b>4kHz-8kHz L</b>                                       | <i>Tinnitus Cmp</i> | 23           | 15            | 18.62       | 17.96     |                     |
|                                                          | <i>Tinnitus Ws</i>  | 31           | 15            | 21.99       | 19.35     |                     |
| <b>4kHz-8kHz R+L</b>                                     | <i>Tinnitus Cmp</i> | 23           | 13.33         | 18.44       | 16.17     |                     |
|                                                          | <i>Tinnitus Ws</i>  | 23           | 15            | 22.5        | 19.19     |                     |
| <hr/>                                                    |                     |              |               |             |           |                     |
| <b>TQ (score)</b>                                        | <i>Tinnitus Cmp</i> | <b>n</b>     | <b>median</b> | <b>mean</b> | <b>sd</b> | <b>distribution</b> |
|                                                          | <i>Tinnitus Ws</i>  | 25           | 27            | 30.24       | 25.78     |                     |
|                                                          |                     | 34           | 27            | 29.5        | 17.53     |                     |
| <b>Tinnitus loudness</b><br><b>(TS, 1-10 scale)</b>      | <i>Tinnitus Cmp</i> | 24           | 4.5           | 4.83        | 2.58      |                     |
|                                                          | <i>Tinnitus Ws</i>  | 33           | 4             | 4.79        | 2.53      |                     |

638 **Table S1.** Demographic characteristics of the subject sample and descriptive statistics for averaged hearing loss and tinnitus  
639 characteristics in Tinnitus groups: *Tinnitus Cmp* for participants included in group comparison with Controls, *Tinnitus Ws* for the whole  
640 sample of subjects with tinnitus. Standard pure-tone audiogram values were averaged for each individual for the lower (125Hz-2kHz)  
641 and higher (4kHz-8kHz) frequency bands and presented here for right (R), left (L) and both ears (R+L). Tinnitus distress scores  
642 presented for Tinnitus Questionnaire (TQ). Tinnitus Loudness reported on the scale 1-10 from the Tinnitus Severity questionnaire.  
643

644

S 2

| <b>Subject No</b> | <b>Group Comparison</b> | <b>125 Hz R</b> | <b>250 Hz R</b> | <b>500Hz R</b> | <b>1kHz R</b> | <b>2kHz R</b> | <b>4kHz R</b> | <b>6kHz R</b> | <b>8kHz R</b> |
|-------------------|-------------------------|-----------------|-----------------|----------------|---------------|---------------|---------------|---------------|---------------|
| 1                 | Yes                     | 10              | 15              | 10             | 5             | 0             | 5             | 5             | 15            |
| 2                 | Yes                     | 5               | 5               | 5              | 5             | 5             | 0             | 0             | 5             |
| 3                 | Yes                     | -5              | 15              | 10             | 5             | 10            | 10            | 20            | 10            |
| 4                 | Yes                     | 5               | 5               | 5              | 5             | -5            | 0             | -5            | 10            |
| 5                 | Yes                     | 15              | 20              | 20             | 5             | 10            | 10            | 10            | 10            |
| 6                 | Yes                     | 15              | 15              | 10             | 10            | 5             | 5             | 10            | 5             |
| 7                 | Yes                     | na              | na              | na             | na            | na            | na            | na            | na            |
| 8                 | Yes                     | 5               | 5               | 15             | 10            | 10            | 5             | 5             | 5             |
| 9                 | Yes                     | na              | na              | na             | na            | na            | na            | na            | na            |
| 10                | Yes                     | 25              | 25              | 25             | 15            | 15            | 10            | 20            | 20            |
| 11                | Yes                     | 35              | 50              | 50             | 45            | 15            | 0             | 0             | 0             |
| 12                | Yes                     | 25              | 15              | 15             | 10            | 10            | 5             | -10           | 0             |
| 13                | Yes                     | 15              | 10              | 10             | 10            | 20            | 25            | 30            | 15            |
| 14                | Yes                     | 10              | 10              | 10             | 10            | 0             | 15            | 20            | 30            |
| 15                | Yes                     | 20              | 25              | 20             | 20            | 20            | 15            | 20            | 10            |
| 16                | Yes                     | 20              | 25              | 25             | 35            | 30            | 30            | 25            | 10            |
| 17                | Yes                     | 10              | 0               | 10             | 10            | 20            | 15            | 20            | 0             |
| 18                | Yes                     | 45              | 65              | 55             | 55            | 50            | 55            | 75            | 80            |
| 19                | Yes                     | 20              | 15              | 20             | 15            | 10            | 20            | 40            | 25            |
| 20                | Yes                     | 30              | 25              | 15             | 10            | 10            | 0             | 5             | 5             |
| 21                | Yes                     | 5               | 5               | 5              | 30            | 15            | 25            | 45            | 45            |
| 22                | Yes                     | 25              | 25              | 20             | 5             | 0             | 10            | 20            | 15            |
| 23                | Yes                     | 10              | 15              | 15             | 10            | 5             | 10            | 35            | 5             |
| 24                | No                      | 20              | 20              | 20             | 20            | 20            | 55            | 60            | 45            |
| 25                | Yes                     | 25              | 25              | 25             | 30            | 20            | 40            | 60            | 70            |
| 26                | Yes                     | 15              | 15              | 25             | 15            | 10            | 15            | 35            | 15            |
| 27                | No                      | 10              | 5               | 5              | 10            | 10            | 55            | 60            | 55            |
| 28                | No                      | 25              | 25              | 25             | 20            | 20            | 20            | 15            | 20            |
| 29                | No                      | na              | na              | na             | na            | na            | na            | na            | na            |
| 30                | No                      | 30              | 30              | 20             | 20            | 30            | 40            | 55            | 60            |
| 31                | No                      | 10              | 10              | 10             | 0             | 5             | 5             | 5             | -5            |
| 32                | No                      | 25              | 25              | 20             | 20            | 25            | 20            | 25            | 30            |
| 33                | No                      | 15              | 10              | 15             | 5             | 10            | 10            | 15            | 10            |
| 34                | No                      | 50              | 55              | 60             | 60            | 70            | 80            | 90            | 100           |

645

646 **Table S2 a.** Detailed audiograms (in dB HL) for each subject with tinnitus, right ear.

647

648

| <b>Subject No</b> | <b>Group Comparison</b> | <b>125 Hz</b> | <b>250 Hz</b> | <b>500Hz</b> | <b>1kHz</b> | <b>2kHz</b> | <b>4kHz</b> | <b>6kHz</b> | <b>8kHz</b> |
|-------------------|-------------------------|---------------|---------------|--------------|-------------|-------------|-------------|-------------|-------------|
|                   |                         | <b>L</b>      | <b>L</b>      | <b>L</b>     | <b>L</b>    | <b>L</b>    | <b>L</b>    | <b>L</b>    | <b>L</b>    |
| <b>1</b>          | Yes                     | 0             | 5             | 5            | 0           | -5          | 0           | 0           | 0           |
| <b>2</b>          | Yes                     | 5             | 5             | 10           | 0           | 0           | 0           | -5          | 0           |
| <b>3</b>          | Yes                     | 5             | 10            | 10           | 10          | 0           | 10          | 10          | 15          |
| <b>4</b>          | Yes                     | 5             | 5             | 5            | 5           | 0           | 0           | -5          | -5          |
| <b>5</b>          | Yes                     | 25            | 25            | 20           | 15          | 10          | 10          | 15          | 10          |
| <b>6</b>          | Yes                     | 10            | 15            | 10           | 5           | 0           | 5           | 0           | 5           |
| <b>7</b>          | Yes                     | <i>na</i>     | <i>na</i>     | <i>na</i>    | <i>na</i>   | <i>na</i>   | <i>na</i>   | <i>na</i>   | <i>na</i>   |
| <b>8</b>          | Yes                     | 0             | 5             | 10           | 0           | 5           | 5           | 5           | 5           |
| <b>9</b>          | Yes                     | <i>na</i>     | <i>na</i>     | <i>na</i>    | <i>na</i>   | <i>na</i>   | <i>na</i>   | <i>na</i>   | <i>na</i>   |
| <b>10</b>         | Yes                     | 30            | 30            | 25           | 15          | 15          | 20          | 55          | 75          |
| <b>11</b>         | Yes                     | 40            | 10            | 10           | 5           | 5           | 10          | 15          | 25          |
| <b>12</b>         | Yes                     | 25            | 20            | 15           | 0           | 0           | 0           | -5          | 0           |
| <b>13</b>         | Yes                     | 15            | 10            | 15           | 10          | 10          | 5           | 25          | 20          |
| <b>14</b>         | Yes                     | 15            | 15            | 15           | 10          | 0           | 15          | 20          | 25          |
| <b>15</b>         | Yes                     | 20            | 20            | 20           | 20          | 20          | 10          | 15          | 20          |
| <b>16</b>         | Yes                     | 20            | 25            | 25           | 30          | 40          | 50          | 35          | 40          |
| <b>17</b>         | Yes                     | 5             | 5             | 10           | 15          | 25          | 10          | 20          | 15          |
| <b>18</b>         | Yes                     | 5             | 5             | 15           | 10          | 10          | 5           | 15          | 10          |
| <b>19</b>         | Yes                     | 20            | 15            | 25           | 25          | 15          | 30          | 35          | 25          |
| <b>20</b>         | Yes                     | 15            | 15            | 15           | 10          | 5           | 0           | 5           | 10          |
| <b>21</b>         | Yes                     | 10            | 5             | 5            | 0           | 10          | 25          | 35          | 55          |
| <b>22</b>         | Yes                     | 20            | 15            | 15           | 10          | 0           | 5           | 15          | 10          |
| <b>23</b>         | Yes                     | 5             | 5             | 5            | 10          | 10          | 10          | 5           | 15          |
| <b>24</b>         | No                      | 15            | 20            | 20           | 25          | 35          | 60          | 55          | 60          |
| <b>25</b>         | Yes                     | 20            | 10            | 10           | 10          | 10          | 20          | 40          | 80          |
| <b>26</b>         | Yes                     | 5             | 10            | 15           | 15          | 15          | 20          | 45          | 55          |
| <b>27</b>         | No                      | 10            | 10            | 5            | 5           | 5           | 40          | 60          | 55          |
| <b>28</b>         | No                      | 20            | 20            | 20           | 10          | 5           | 5           | 5           | 10          |
| <b>29</b>         | No                      | <i>na</i>     | <i>na</i>     | <i>na</i>    | <i>na</i>   | <i>na</i>   | <i>na</i>   | <i>na</i>   | <i>na</i>   |
| <b>30</b>         | No                      | 25            | 20            | 15           | 15          | 35          | 50          | 60          | 60          |
| <b>31</b>         | No                      | 5             | 5             | 10           | 10          | 0           | 5           | 5           | 5           |
| <b>32</b>         | No                      | 25            | 25            | 20           | 10          | 5           | 20          | 30          | 35          |
| <b>33</b>         | No                      | 10            | 15            | 10           | 10          | 15          | 30          | 35          | 55          |
| <b>34</b>         | No                      | 30            | 30            | 30           | 20          | 20          | 35          | 45          | 55          |

649

650 **Table S2 b.** Detailed audiograms (in dB HL) for each subject with tinnitus, left ear.

651

652

653

654

S 3

655

### Time-generalised regression $\beta$

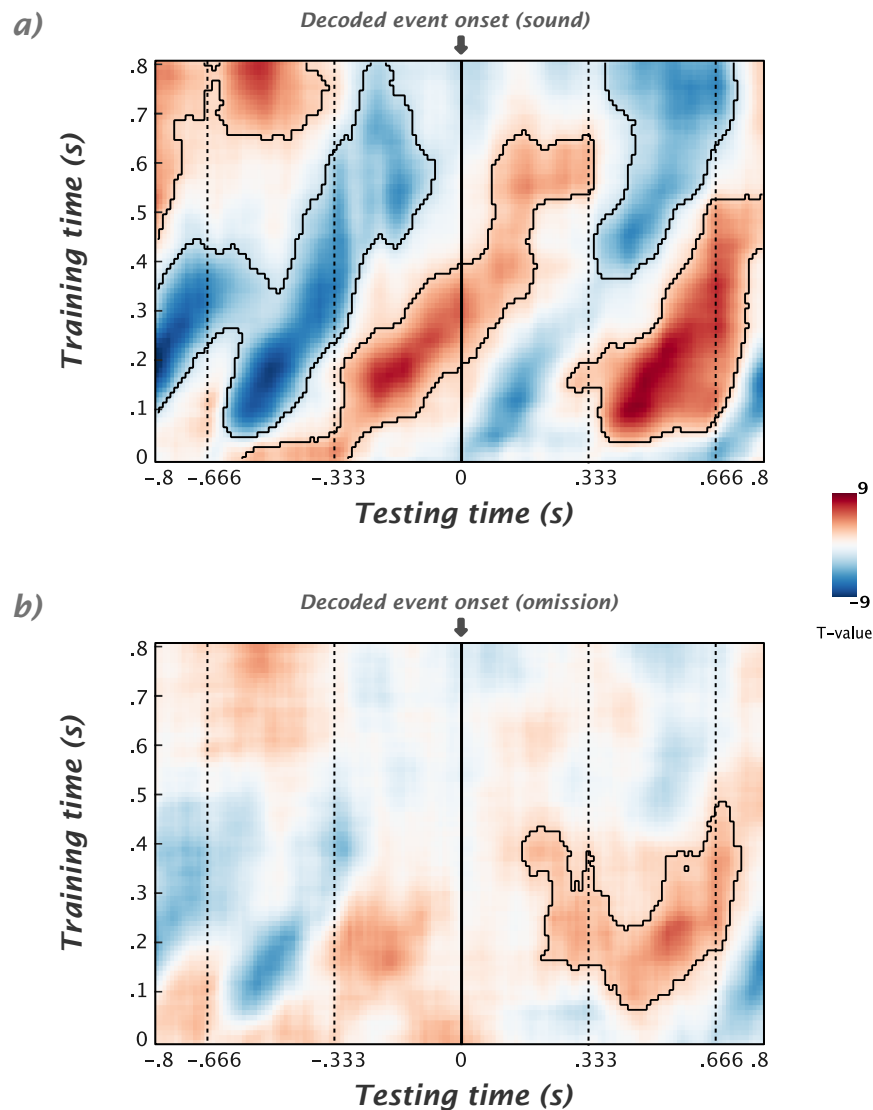

656

657

658 **Figure S3.** Time generalisation of  $\beta$ -coefficient values in the sample of Tinnitus Cmp and Controls joint together (N=50), tested  
659 against 0: a) For sound trials, we observe a pattern as reported in the previous study: carrier frequency specific templates are most  
660 strongly driven by early training time (~100-150 ms) and emerge in accordance to regularity level, in anticipatory period before the  
661 presentation of the sound as well as after the presentation of the consecutive tone (~450 ms in testing time). In the omission trials  
662 (b) the pre-stimulus effects do not reach significance but we observe the post-stimulus significant linear increase of decoding  
663 accuracy with regularity, emerging at approx ~150 ms after expected sound omission. These results point to presence of anticipatory  
664 activation of the templates corresponding to carrier frequency dependent on predictability and reactivation based on the knowledge  
665 about the sound sequence, putatively related to short-term memory processes.

666  
667

S4

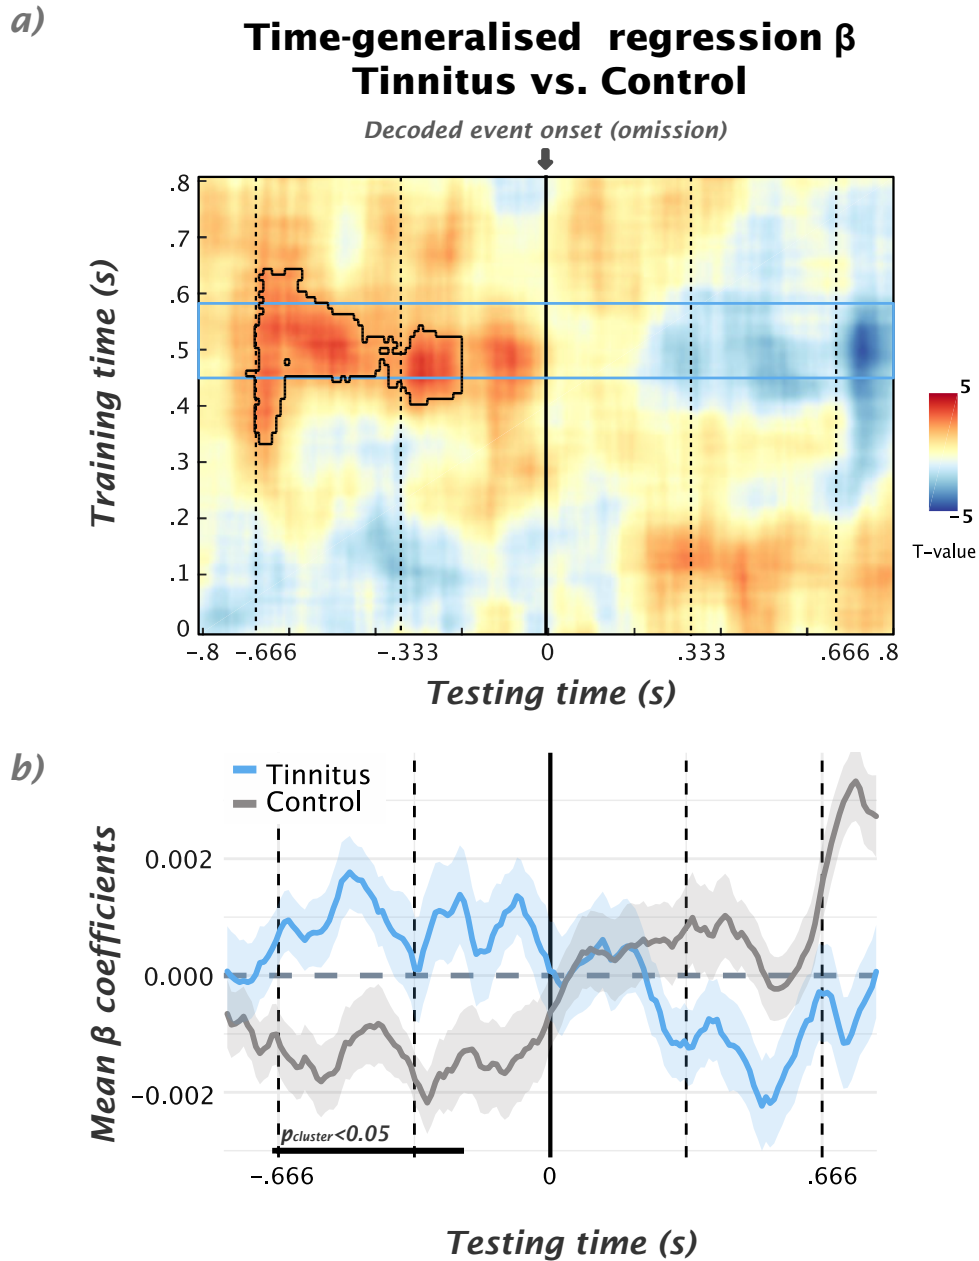

668

669

670

671 **Figure S4.** a) Group comparison (see Figure 1c) of  $\beta$ -coefficient values between Tinnitus vs. Control groups in time-generalised matrix  
672 in omission trials. Colors indicate t-values and solid black borders delimiting periods of significant difference ( $p < 0.05$ , cluster  
673 corrected). b) Time courses of  $\beta$ -coefficients averaged over 480-580ms training time-window (indicated by the blue rectangle and  
674 corresponding to the one previously demonstrated in sound-type trials), showing effects driven by a relative increase of regularity-  
675 dependent carrier frequency specific activity prior to anticipated onset period in Tinnitus group.

676  
677  
678  
679  
680

681  
682  
683  
684

S 5

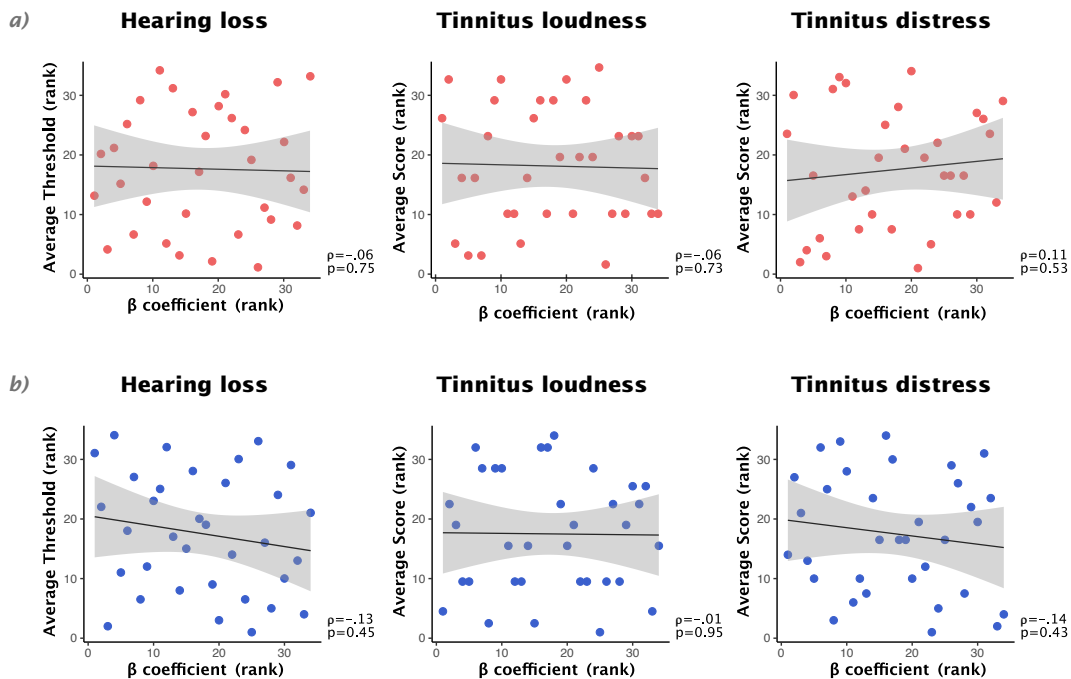

685  
686  
687  
688  
689  
690  
691  
692

**Figure S5.** Scatter plots of hearing loss (left), tinnitus loudness (1-10 scale, middle) and tinnitus distress (TQ, right) measures with individual  $\beta$ -coefficient values (same as in **Figure 2c**) in Tinnitus group. a.) Pre-stimulus positive cluster, no significant correlation was revealed ( $p > 0.05$ , uncorrected). b.) Post-stimulus negative cluster, no significant correlation was shown for any of the tested factors ( $p > 0.05$ , uncorrected).
